# Supplementary material for: Replacing the non-polarized CC bond with an isoelectronic polarized B–N unit for the design and development of smart materials
Source: Royal Society of Chemistry journal article supplement (doi:10.1039/c6tc04470k), 2016-01-01
Supplement: c6tc04470k1.pdf [file c6tc04470k1.pdf]

## *Supporting Information*

# **Replacing the non-polarized C=C bond with an isoelectronic polarized B-N unit for the design and development of smart materials**

Kalluvettukuzhy K. Neena and Pakkirisamy Thilagar\*

Department of Inorganic and Physical Chemistry, Indian Institute of Science, Bangalore -560012, India.

*Ph. No:* +91-080-2293 3353 *Fax:* +91-80-2360 1552 *\*E-mail:* [thilagar@ipc.iisc.ernet.in](mailto:thilagar@ipc.iisc.ernet.in)

## NMR Spectral Characterizations

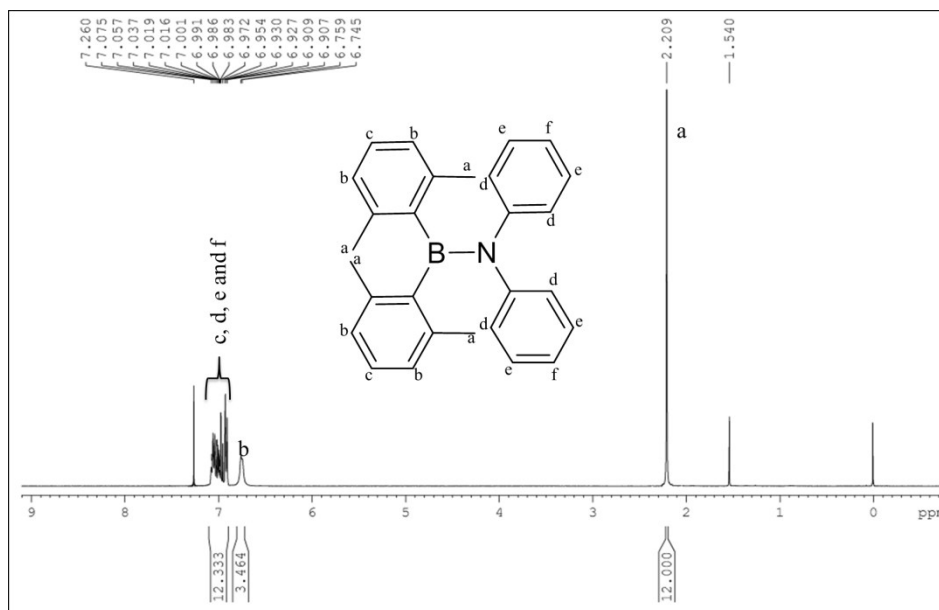

**Figure S1.**  $^1\text{H}$  NMR spectrum of compound **1** ( $\delta = 1.54$  ppm corresponds to  $\text{H}_2\text{O}$  in  $\text{CDCl}_3$ ).

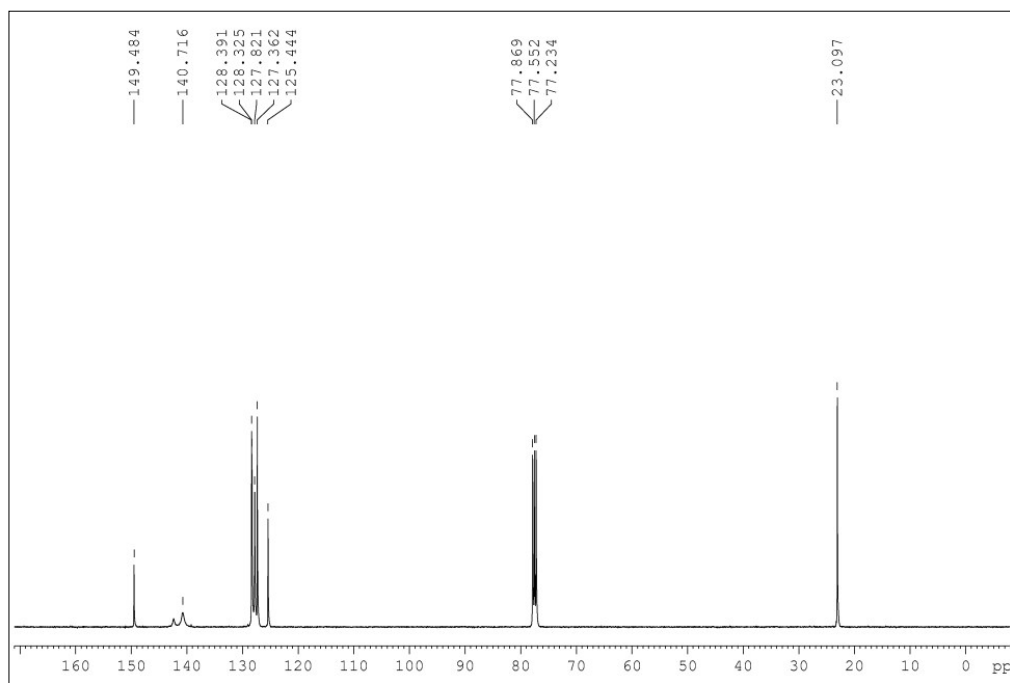

**Figure S2.**  $^{13}\text{C}$  NMR spectrum of compound **1**

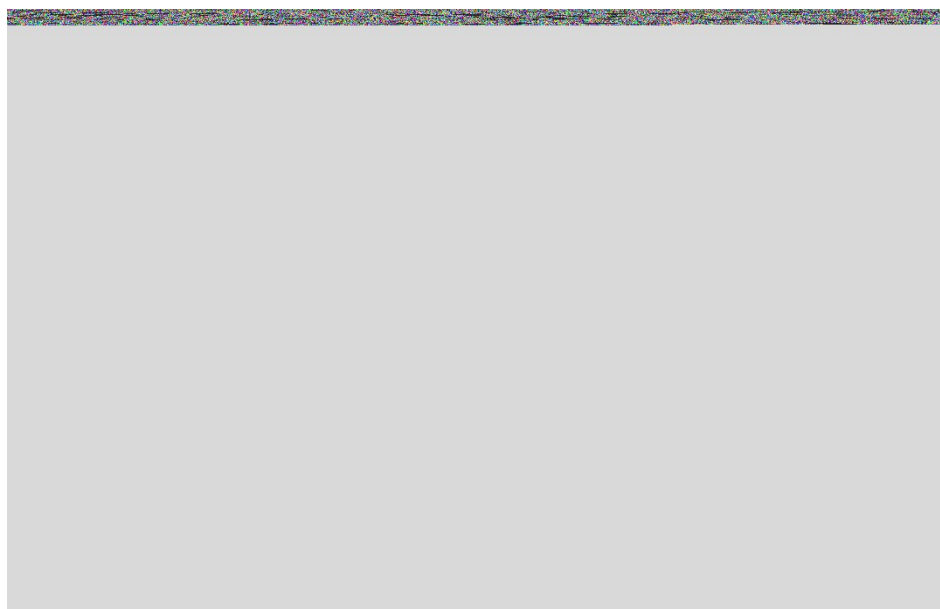

**Figure S3.**  $^1\text{H}$  NMR spectrum of compound **2** ( $\delta = 1.54$  ppm corresponds to  $\text{H}_2\text{O}$  in  $\text{CDCl}_3$ )

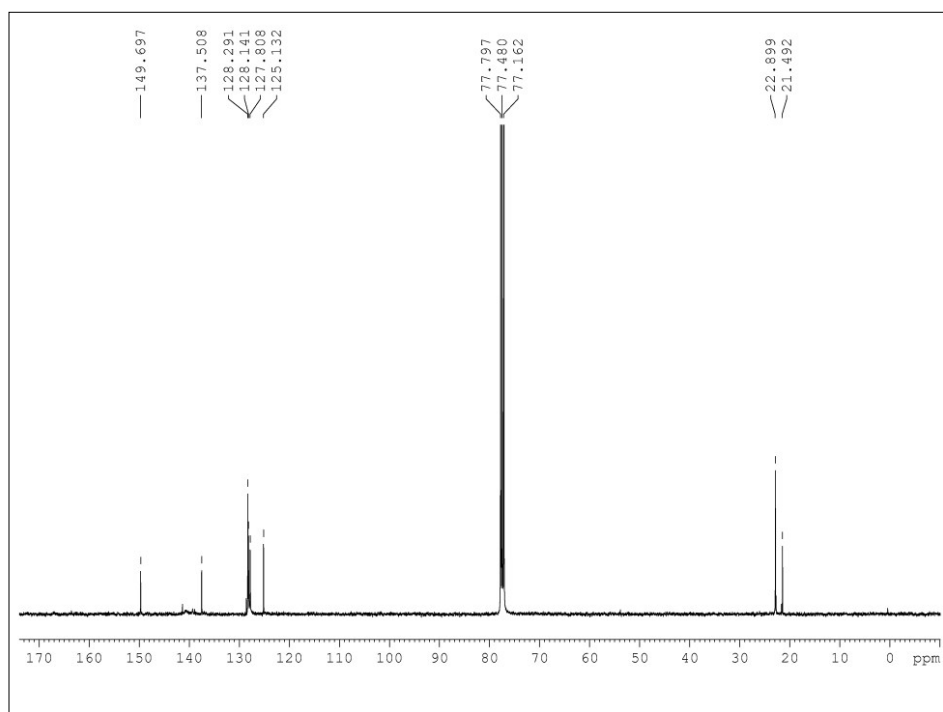

**Figure S4.**  $^{13}\text{C}$  NMR spectrum of compound **2**

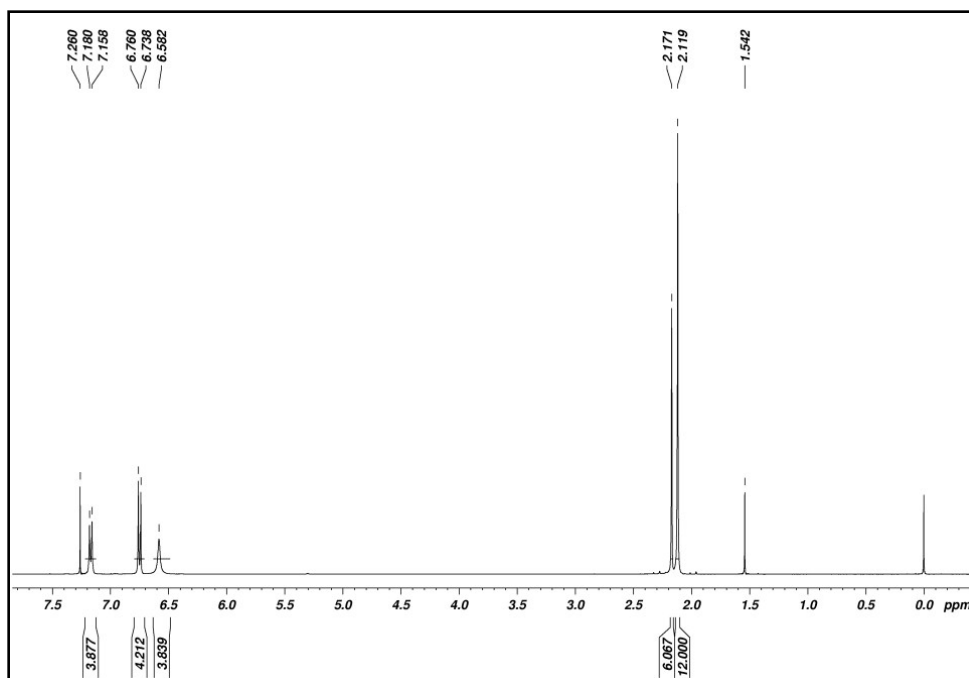

**Figure S5.**  $^1\text{H}$  NMR spectrum of compound **2a** ( $\delta = 1.54$  ppm corresponds to  $\text{H}_2\text{O}$  in  $\text{CDCl}_3$ )

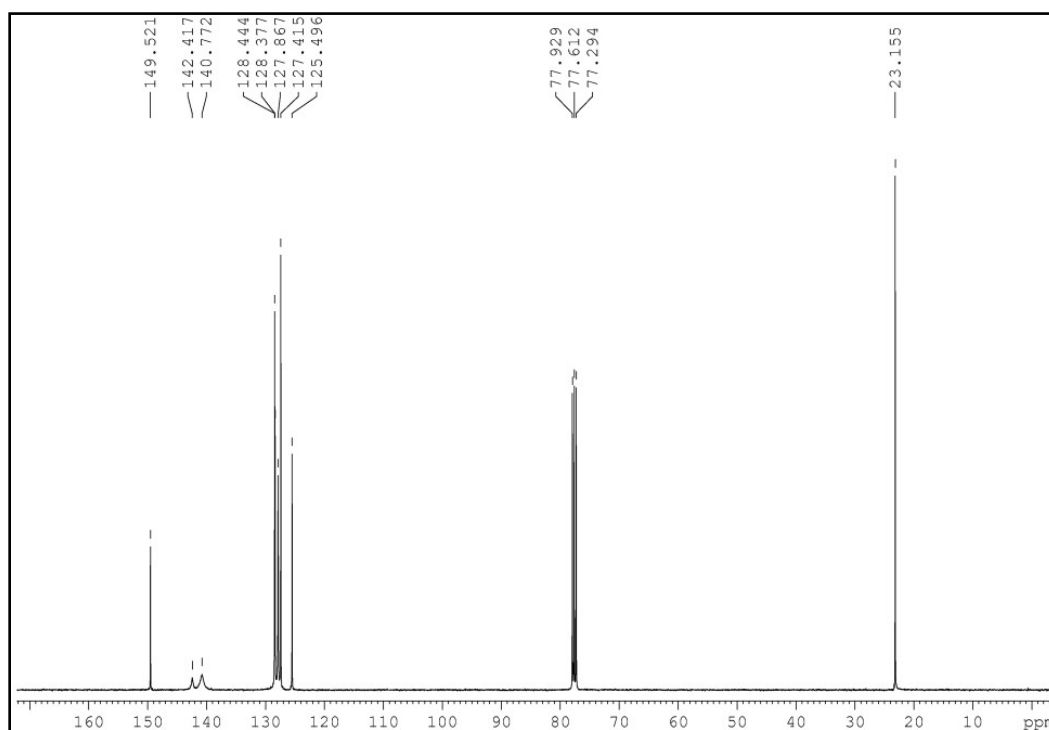

**Figure S6.**  $^{13}\text{C}$  NMR spectrum of compound **2a**

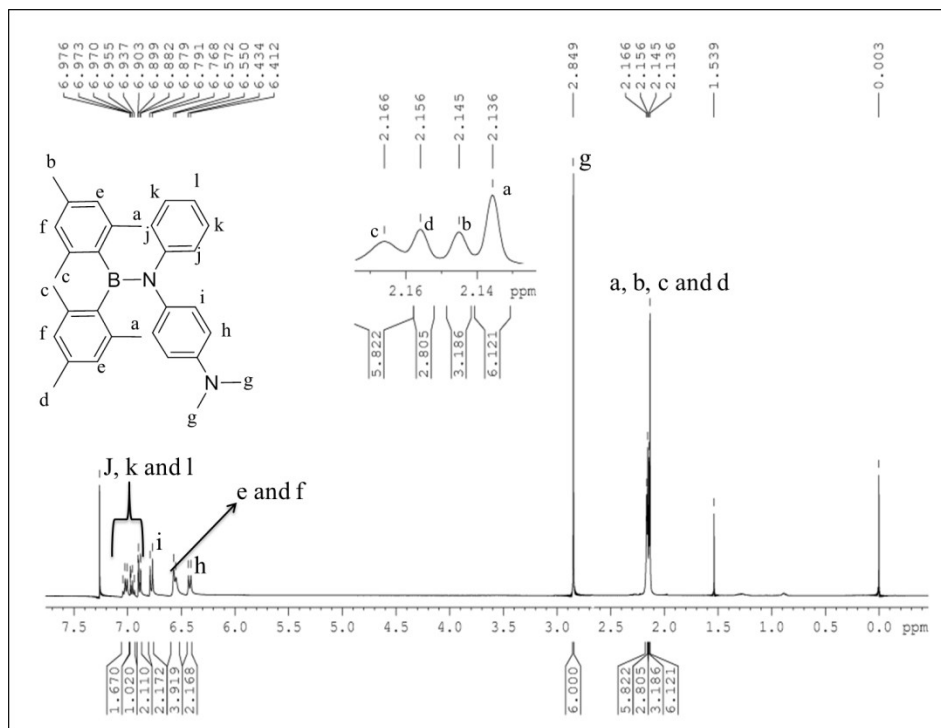

**Figure S7.** <sup>1</sup>H NMR spectrum of compound 3 ( $\delta = 1.54$  ppm corresponds to H<sub>2</sub>O in CDCl<sub>3</sub>)

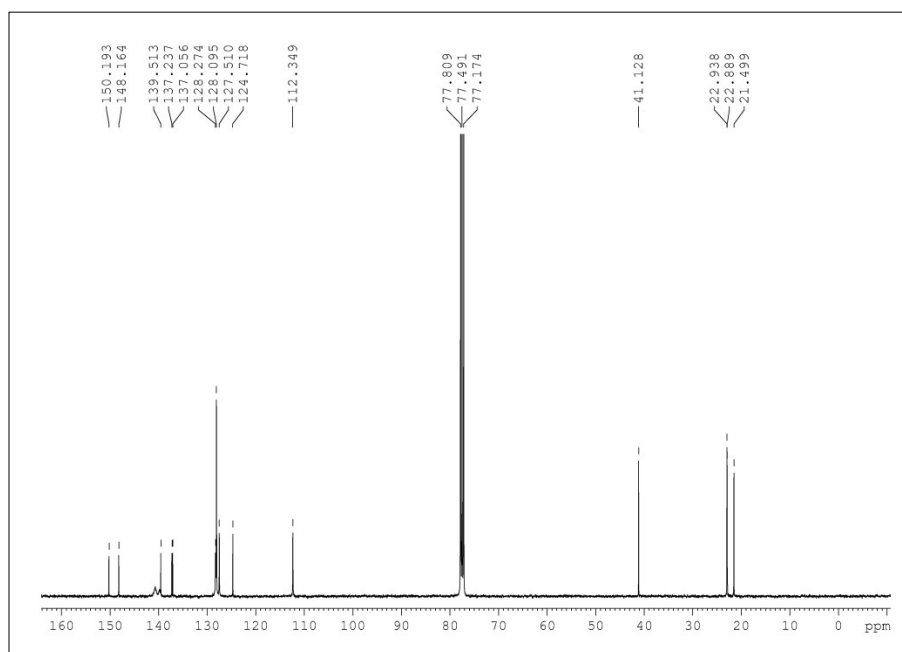

**Figure S8.** <sup>13</sup>C NMR spectrum of compound 3

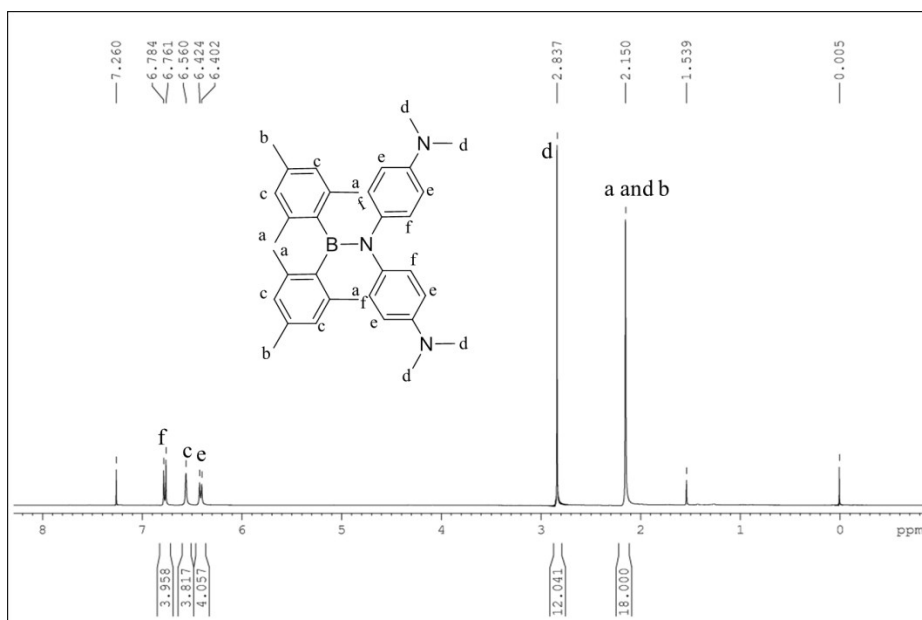

**Figure S9.**  $^1\text{H}$  NMR spectrum of compound 4 ( $\delta = 1.54$  ppm corresponds to  $\text{H}_2\text{O}$  in  $\text{CDCl}_3$ )

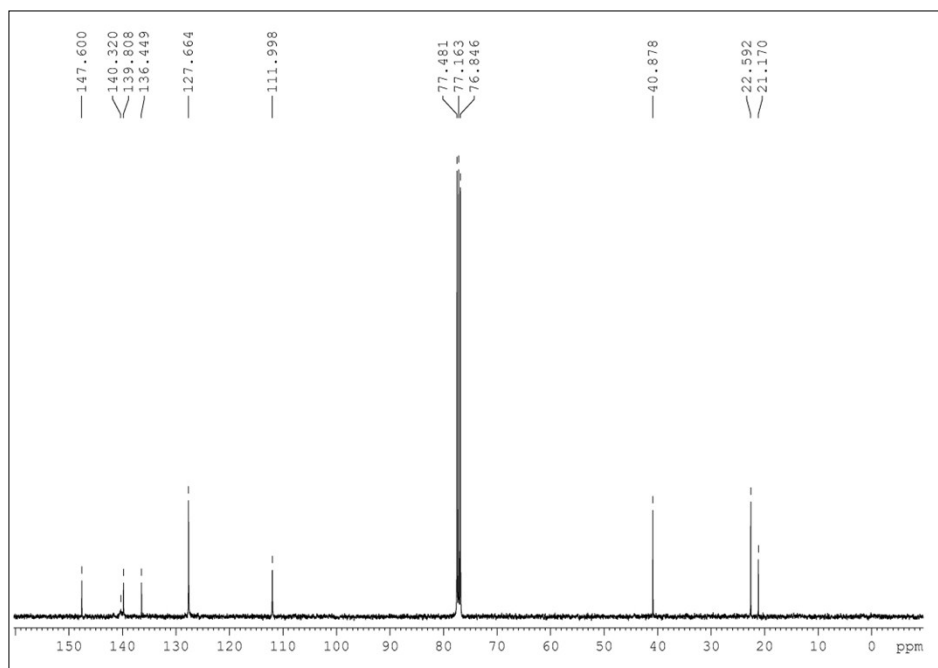

**Figure S10.**  $^{13}\text{C}$  NMR spectrum of compound 4

## Mass Spectral Characterization

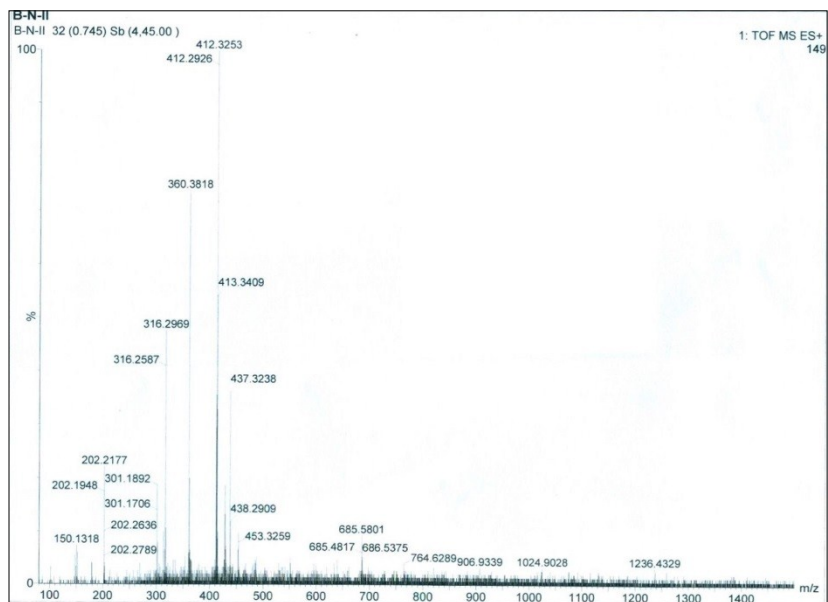

Figure S11. HRMS of compound 1

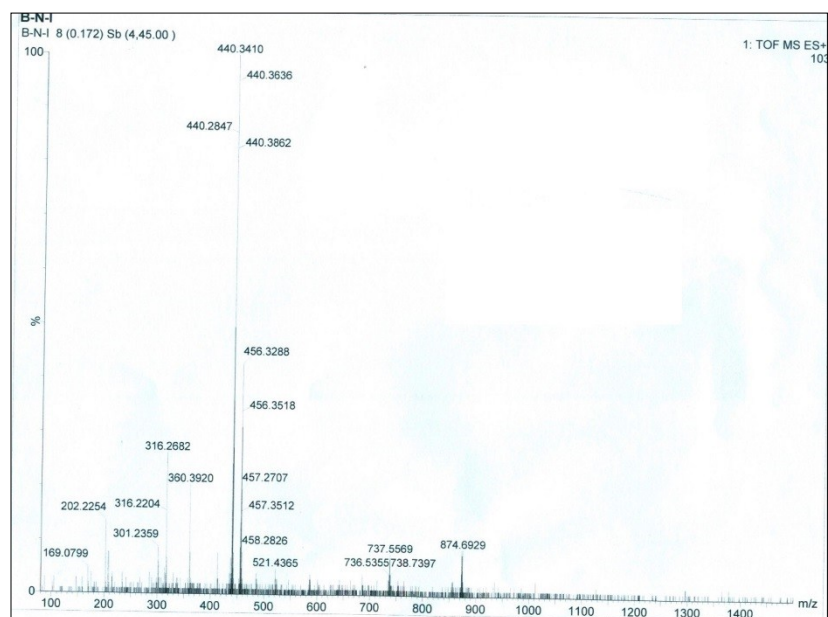

Figure S12. HRMS of compound 2

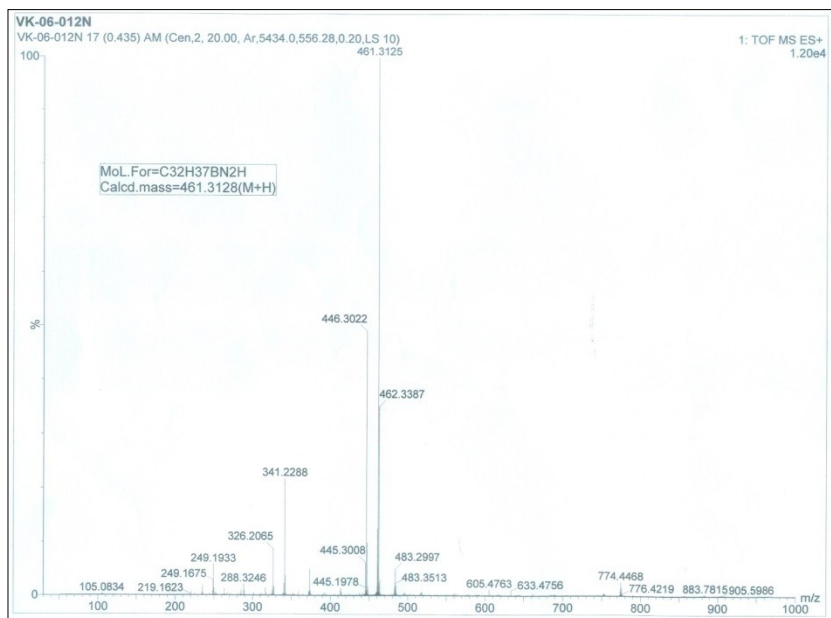

Figure S13. HRMS of compound 3

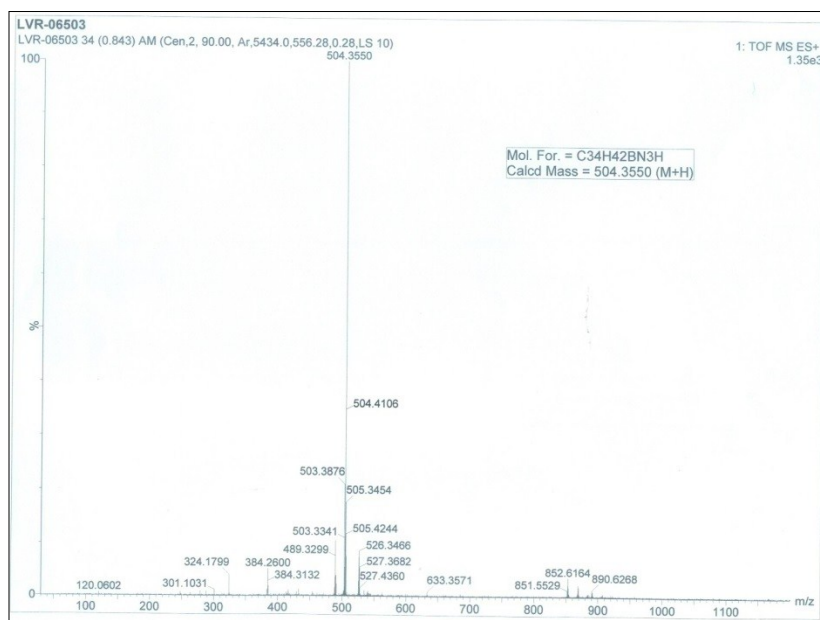

Figure S14. HRMS of compound 4



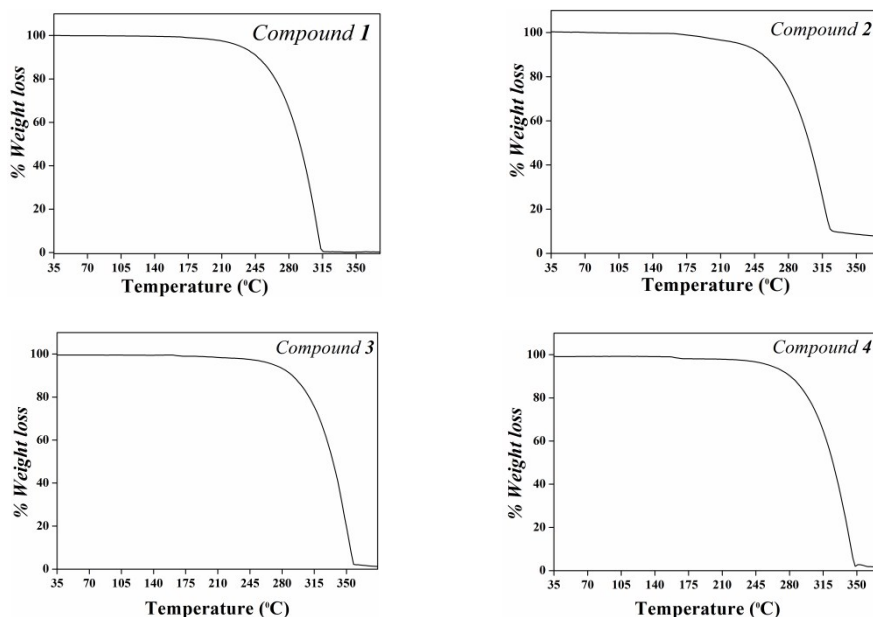

**Figure S15.** Thermo gravimetric traces of compounds **1**, **2**, **3** and **4**.

### Optical Spectra of compounds **1**, **2**, **3** and **4**

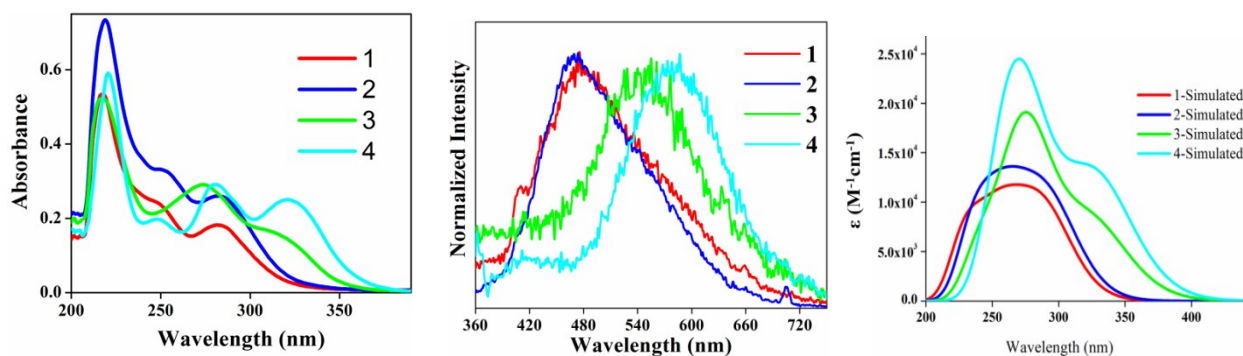

**Figure S16.** Absorption (right), emission (middle) spectra of compounds **1**, **2**, **3** and **4** in THF solvent (conc.  $10^{-5}$  M,  $\lambda_{\text{ex}} = 320$  nm for **1** and **2** and  $\lambda_{\text{ex}} = 350$  nm for **3** and **4** respectively) and simulated absorption spectra from TD-DFT calculations (left). (Quantum yield in solution were calculated with respect to anthracene ( $\phi_{\text{F}} = 27$  % in EtOH) and was found to be 0.2 %, 0.3 %, 0.03 %, 0.01 % respectively for **1**, **2**, **3** and **4**).

**Table S1.** Summary of dominant electronic transitions of compounds **1**, **2**, **3** and **4** obtained from TD-DFT calculations.

| Compound | Excited State | E/eV  | E/nm   | f     | Dominant transitions (percent contribution) |
|----------|---------------|-------|--------|-------|---------------------------------------------|
| <b>1</b> | 1             | 4.261 | 291.01 | 0.205 | HOMO ->LUMO (97%)                           |
|          | 2             | 4.508 | 275.03 | 0.002 | HOMO-1 ->LUMO (94%)                         |
|          | 3             | 4.624 | 268.11 | 0.026 | HOMO-3 ->LUMO (56%)                         |
|          | 4             | 4.641 | 267.16 | 0.019 | HOMO-2 ->LUMO (55%)                         |
|          | 5             | 4.716 | 262.90 | 0.047 | HOMO ->LUMO+1 (65%)                         |
|          | 6             | 4.832 | 256.60 | 0.111 | HOMO ->LUMO+2 (64%)                         |
| <b>2</b> | 1             | 4.193 | 295.70 | 0.207 | HOMO ->LUMO (98%)                           |
|          | 2             | 4.496 | 275.76 | 0.048 | HOMO-2 ->LUMO (95 %)                        |
|          | 3             | 4.500 | 275.49 | 0.005 | HOMO-1 ->LUMO (93%)                         |
|          | 4             | 4.623 | 268.22 | 0.019 | HOMO-3 ->LUMO (82%)                         |
|          | 5             | 4.664 | 265.81 | 0.063 | HOMO ->LUMO+1 (62%)                         |
|          | 6             | 4.768 | 260.06 | 0.099 | HOMO ->LUMO+2 (61%)                         |
| <b>3</b> | 1             | 3.787 | 327.40 | 0.180 | HOMO ->LUMO (98%)                           |
|          | 2             | 4.212 | 294.37 | 0.045 | HOMO ->LUMO+1 (92%)                         |
|          | 3             | 4.442 | 279.11 | 0.239 | HOMO ->LUMO+2 (80%)                         |
|          | 4             | 4.507 | 257.07 | 0.008 | HOMO-1 ->LUMO (57%)                         |
|          | 5             | 4.540 | 273.09 | 0.043 | HOMO-2 ->LUMO (63%)                         |
|          | 6             | 4.577 | 270.89 | 0.079 | HOMO-1 ->LUMO+1 (23%)                       |
| <b>4</b> | 1             | 3.745 | 331.07 | 0.275 | HOMO ->LUMO (99%)                           |
|          | 2             | 4.066 | 304.94 | 0.052 | HOMO ->LUMO+1 (94%)                         |
|          | 3             | 4.263 | 290.84 | 0.042 | HOMO-1 ->LUMO (87%)                         |
|          | 4             | 4.418 | 280.67 | 0.202 | HOMO ->LUMO+2 (81%)                         |
|          | 5             | 4.441 | 279.18 | 0.008 | HOMO ->LUMO+4 (86%)                         |
|          | 6             | 4.526 | 273.92 | 0.104 | HOMO ->LUMO+3 (91%)                         |

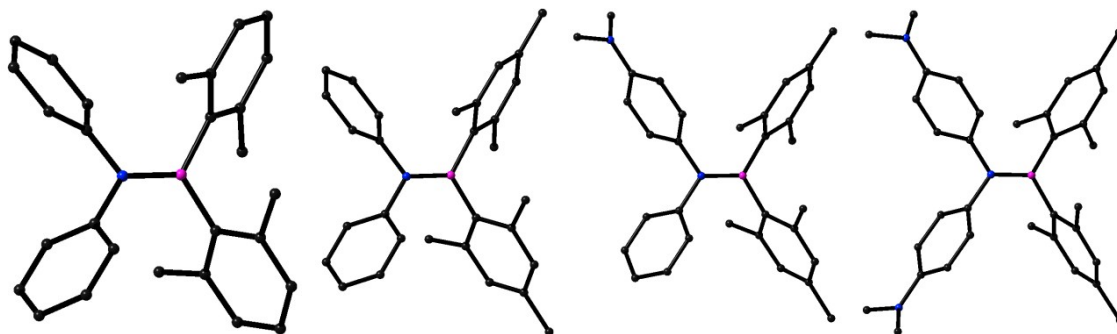

**Figure S17.** Ground state DFT optimized structures of **1**, **2**, **3** and **4** (left to right) from the ground state DFT optimized structures (Atom color codes: C-black, N-blue, B-purple, hydrogen atoms are removed for clarity).

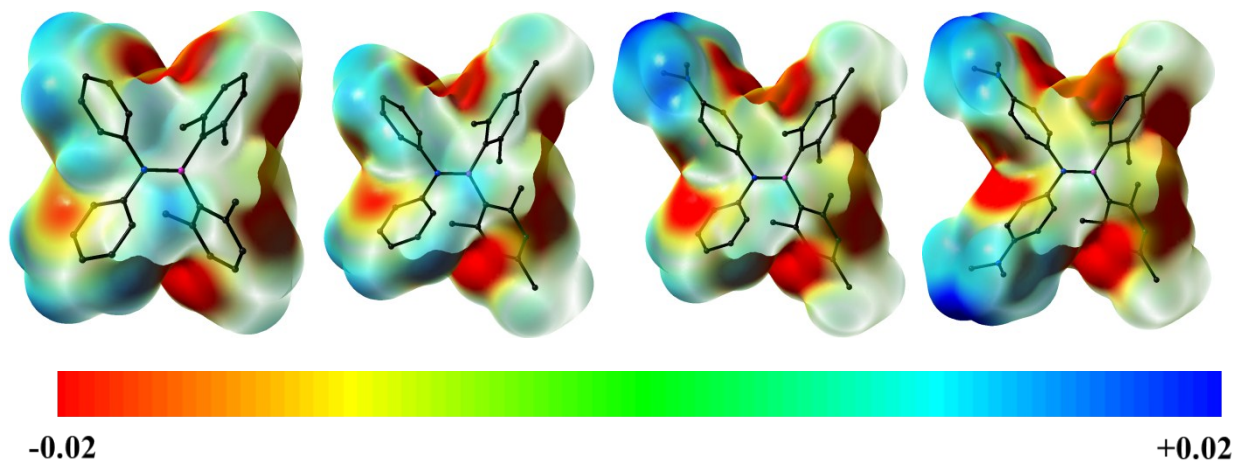

**Figure S18.** Electrostatic potential energy surface diagrams of **1**, **2**, **3** and **4** (left to right) from the ground state DFT optimized structures (Atom color codes: C-black, N-blue, B-purple, hydrogen atoms are removed for clarity, isovalue = 0.0004).

## Solvent dependent absorption and emission spectra of 1, 2, 3 and 4

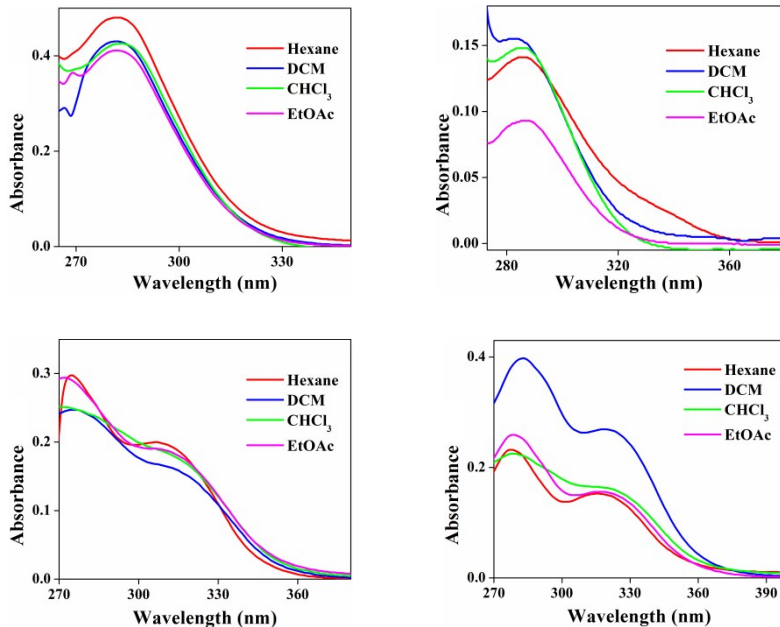

**Figure S19.** Absorption spectra of **1** (top left), **2** (top right), **3** (bottom left) and **4** (bottom right) in different solvents (Conc. 10<sup>-5</sup> M).

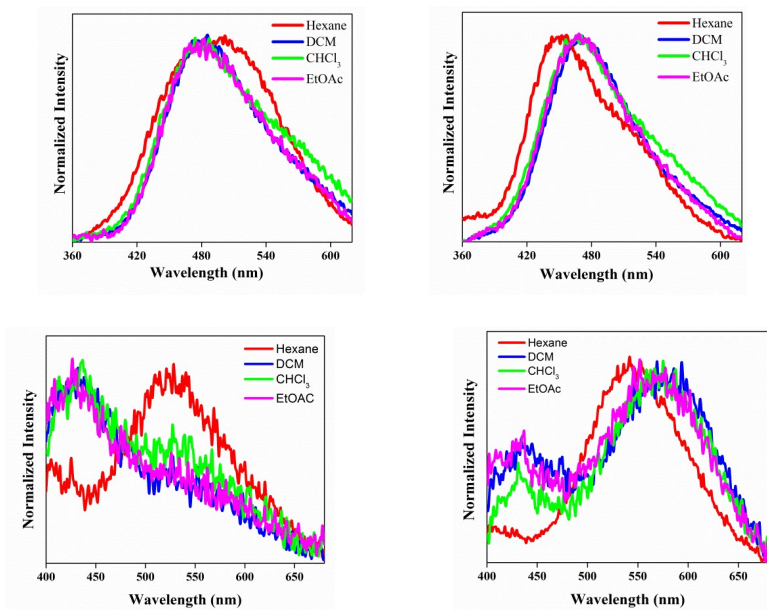

**Figure S20.** Normalized emission spectra of **1** (top left), **2** (top right), **3** (bottom left) and **4** (bottom right) in different solvents, (Conc. 10<sup>-5</sup> M,  $\lambda_{\text{ex}}$  = 320 nm for **1** and **2** and  $\lambda_{\text{ex}}$  = 350 nm for **3** and **4** respectively).

**Table S2.** Luminescence data of **1**, **2**, **3** and **4** in different Solvents (Conc.  $10^{-5}$  M)

|          | Solvent         | $\lambda_{\text{abs}}$<br>(nm) | $\lambda_{\text{em}}$<br>(nm) | $\nu$<br>( $\text{cm}^{-1}$ ) |
|----------|-----------------|--------------------------------|-------------------------------|-------------------------------|
| <b>1</b> | Hexane          | 282                            | 490                           | 15053                         |
|          | DCM             | 282                            | 483                           | 14757                         |
|          | $\text{CHCl}_3$ | 282                            | 484                           | 14800                         |
|          | EtOAc           | 282                            | 485                           | 14842                         |
| <b>2</b> | Hexane          | 286                            | 452                           | 12841                         |
|          | DCM             | 286                            | 469                           | 13643                         |
|          | $\text{CHCl}_3$ | 286                            | 471                           | 13734                         |
|          | EtOAc           | 287                            | 470                           | 13567                         |
| <b>3</b> | Hexane          | 313                            | 525                           | 12901                         |
|          | DCM             | 313                            | <i>n.d</i>                    | <i>n.d</i>                    |
|          | $\text{CHCl}_3$ | 313                            | <i>n.d</i>                    | <i>n.d</i>                    |
|          | EtOAc           | 313                            | <i>n.d</i>                    | <i>n.d</i>                    |
| <b>4</b> | Hexane          | 323                            | 544                           | 12577                         |
|          | DCM             | 323                            | 579                           | 13689                         |
|          | $\text{CHCl}_3$ | 323                            | 575                           | 13568                         |
|          | EtOAc           | 323                            | 571                           | 13447                         |

\**n.d*= not determined

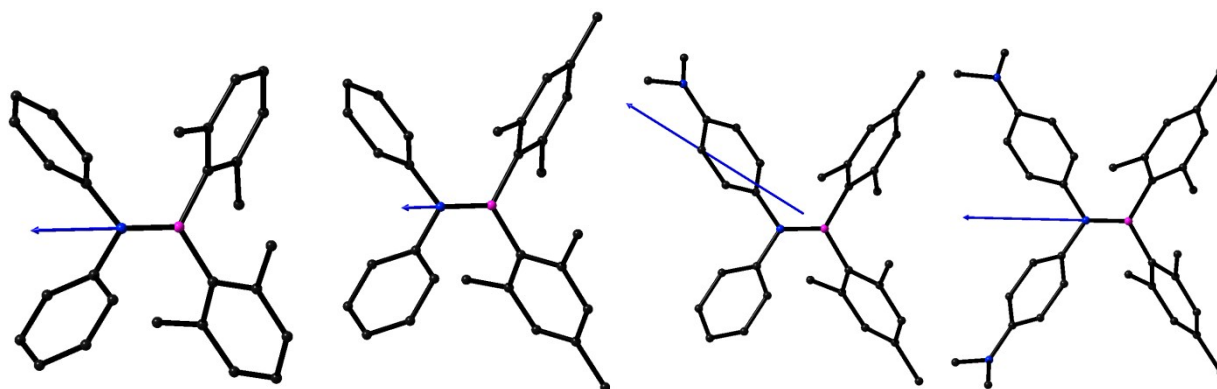

**Figure S21.** Orientation of ground state dipole moment of **1**, **2**, **3** and **4** (left to right) from the DFT optimized structures (Atom color codes: C-black, N-blue, B-purple, hydrogen atoms are removed for clarity).

**Table S3.** Ground state and excited state dipole moment values of **1**, **2**, **3** and **4**

| Compound No. | Dipole moment (Debye)                 |                                        |                             |
|--------------|---------------------------------------|----------------------------------------|-----------------------------|
|              | Ground state ( $\mu_g$ ) <sup>a</sup> | Excited state ( $\mu_e$ ) <sup>b</sup> | $\Delta\mu = \mu_e - \mu_g$ |
| <b>1</b>     | 1.61                                  | 6.59                                   | 4.98                        |
| <b>2</b>     | 1.15                                  | 6.79                                   | 5.64                        |
| <b>3</b>     | 3.39                                  | <i>n.d</i>                             | <i>n.d</i>                  |
| <b>4</b>     | 4.38                                  | 10.39                                  | 6.01                        |

a. obtained from DFT calculations; b.  $\Delta\nu^s = (2\Delta\mu^2/hca_0^3) f(X) + A$ , where  $\Delta\mu$  is the electric dipole moment change upon electronic transition and  $h$ ,  $c$ ,  $a_0$ , and  $A$  are the Planck's constant ( $h = 6.626 \times 10^{-34}$  J s), speed of light ( $c = 2.99 \times 10^8$  m/s), Onsager radius of fluorophore and a constant. \**n.d*= not determined.

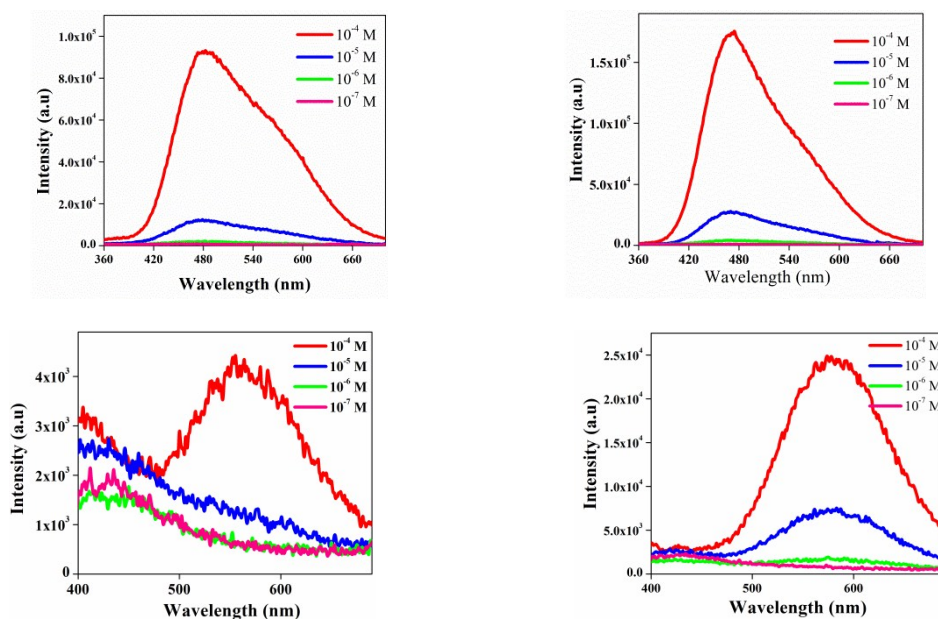**Figure S22.** Emission spectra of **1** (top left), **2** (top right), **3** (bottom left) and **4** (bottom right) at different concentrations in THF solvent ( $\lambda_{ex}$  = 320 nm for **1** and **2** and 350 nm for **3** and **4**).

## Single crystal X-ray diffraction studies

**Table S4.** Crystallographic refinement data of compounds **1**, **2**, **3** and **4**

|                                   | <b>1</b>                                                      | <b>2</b>                                                      | <b>3</b>                                                      | <b>4</b>                                                      |
|-----------------------------------|---------------------------------------------------------------|---------------------------------------------------------------|---------------------------------------------------------------|---------------------------------------------------------------|
| Empirical formula                 | C <sub>28</sub> H <sub>28</sub> B <sub>1</sub> N <sub>1</sub> | C <sub>30</sub> H <sub>32</sub> B <sub>1</sub> N <sub>1</sub> | C <sub>32</sub> H <sub>37</sub> B <sub>1</sub> N <sub>2</sub> | C <sub>34</sub> H <sub>42</sub> B <sub>1</sub> N <sub>3</sub> |
| Formula weight                    | 389.32                                                        | 417.38                                                        | 460.46                                                        | 503.52                                                        |
| Temperature(K)                    | 100(2)                                                        | 100(2)                                                        | 298(2)                                                        | 100(2)                                                        |
| Wavelength (Å)                    | 0.71073                                                       | 0.71073                                                       | 0.71073                                                       | 0.71073                                                       |
| Crystal system                    | Monoclinic                                                    | Monoclinic                                                    | Monoclinic                                                    | Monoclinic                                                    |
| Space group                       | <i>P2<sub>1</sub>/c</i>                                       | <i>P2<sub>1</sub>/c</i>                                       | <i>P2<sub>1</sub>/c</i>                                       | <i>P2<sub>1</sub>/c</i>                                       |
| a/ Å                              | 9.224(5)                                                      | 9.418(4)                                                      | 17.373(28)                                                    | 20.500(12)                                                    |
| b/ Å                              | 15.412(8)                                                     | 15.613(6)                                                     | 9.361(14)                                                     | 12.535(7)                                                     |
| c/ Å                              | 16.217(8)                                                     | 16.741(7)                                                     | 18.579(29)                                                    | 14.258(8)                                                     |
| α/°                               | 90.0                                                          | 90.0                                                          | 90.0                                                          | 90.0                                                          |
| β/°                               | 99.8(14)                                                      | 94.8(11)                                                      | 113.2(7)                                                      | 105.8(2)                                                      |
| γ/°                               | 90                                                            | 90                                                            | 90                                                            | 90                                                            |
| V/Å <sup>3</sup>                  | 2272.0(2)                                                     | 2452.9(17)                                                    | 2775.9(91)                                                    | 3524.5(21)                                                    |
| Crystal size (mm <sup>3</sup> )   | 0.10 x 0.08 x 0.05                                            | 0.1 x 0.09 x 0.07                                             | 0.20 x 0.09 x 0.07                                            | 0.12x0.08x0.06                                                |
| Z                                 | 4                                                             | 4                                                             | 4                                                             | 4                                                             |
| Density(g cm <sup>-3</sup> )      | 1.138                                                         | 1.13                                                          | 1.10                                                          | 0.95                                                          |
| Final R [I>2s(I)]<br>[a], [b]     | R1 = 0.0675,<br>wR2 = 0.1858                                  | R1 = 0.0662,<br>wR2 = 0.1914                                  | R1 = 0.049,<br>wR2 = 0.121                                    | R1 = 0.124,<br>wR2 = 0.394                                    |
| R (all data) <sup>[a], [b]</sup>  | R1 = 0.0889,<br>wR2 = 0.2023                                  | R1 = 0.0969,<br>wR2 = 0.2148                                  | R1 = 0.089,<br>wR2 = 0.137                                    | R1 = 0.159,<br>wR2 = 0.413                                    |
| Collected reflns                  | 71456                                                         | 68641                                                         | 40669                                                         | 31085                                                         |
| Unique reflns                     | 3987                                                          | 4295                                                          | 5468                                                          | 3177                                                          |
| Theta range for data collection   | 3.06 to 25.00                                                 | 3.13 to 25.00                                                 | 1.3 to 26.00                                                  | 3.0 to 26.0                                                   |
| Absorption coefficient            | 0.064 mm <sup>-1</sup>                                        | 0.064 mm <sup>-1</sup>                                        | 0.063 mm <sup>-1</sup>                                        | 0.054                                                         |
| Goodness-of-fit on F <sup>2</sup> | 1.042                                                         | 0.962                                                         | 0.966                                                         | 1.75                                                          |
| CCDC No.                          | 1453219                                                       | 1453220                                                       | 1453221                                                       | 1453222                                                       |

\*\* Unidentified solvent molecule in the crystal lattice of compound **4** was removed by giving squeeze command

$${}^{[a]}R_1 = \Sigma \left| |F_o| - |F_c| \right| / \Sigma |F_o|, {}^{[b]}wR_2 = [\Sigma\{w(F_o^2 - F_c^2)^2\} / \Sigma\{w(F_o^2)^2\}]^{1/2}$$

**Table S5.** Selected bond lengths (Å), bond angles and dihedral angles (°) for **1**, **2**, **3** and **4**

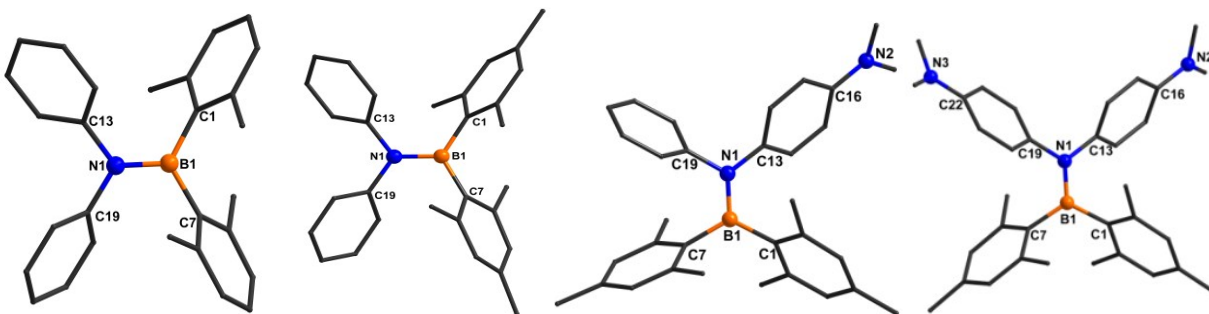

Molecular Structures of compounds **1**, **2**, **3** and **4** (left to right) with atom numbering schemes.

|               | <b>1</b>   | <b>2</b> | <b>3</b> | <b>4</b>  |
|---------------|------------|----------|----------|-----------|
| B1-N1         | 1.423(3)   | 1.429(3) | 1.419(2) | 1.416(7)  |
| B1-C1         | 1.591(3)   | 1.587(3) | 1.587(2) | 1.586(5)  |
| B1-C7         | 1.600(3)   | 1.587(3) | 1.590(2) | 1.586(5)  |
| N1-C13        | 1.449(3)   | 1.443(3) | 1.442(2) | 1.455(4)  |
| N1-C19        | 1.444(3)   | 1.443(3) | 1.443(2) | 1.455(4)  |
| N2-C16        | -          | -        | 1.380(2) | 1.396(5)  |
| N3-C22        | -          | -        | -        | 1.396(5)  |
| ∠C1-B1-C7     | 121.93(19) | 122.6(2) | 122.4(1) | 119.5(4)  |
| ∠N1-B1-C1     | 120.26(19) | 119.9(2) | 120.2(1) | 120.3(5)  |
| ∠N1-B1-C7     | 117.8(2)   | 117.5(2) | 117.4(1) | 120.3(5)  |
| ∠C13-N1-C19   | 112.77(17) | 113.8(2) | 113.2(1) | 114.2(3)  |
| ∠B1-N1-C13    | 124.39(18) | 123.5(2) | 125.1(1) | 122.9(4)  |
| ∠B1-N1-C19    | 122.84(18) | 122.7(2) | 121.6(1) | 122.9(4)  |
| ∠C1-B1-N1-C13 | -10.9(3)   | -12.2(3) | -14.8(2) | 23.7(7)   |
| ∠C7-B1-N1-C19 | -10.7(3)   | -9.5(3)  | -10.1(2) | 23.7(7)   |
| ∠C1-B1-N1-C19 | 168.8(2)   | 169.3(2) | 168.2(1) | -156.3(4) |
| ∠C7-B1-N1-C13 | 169.6(2)   | 169.0(2) | 166.8(1) | -156.3(4) |



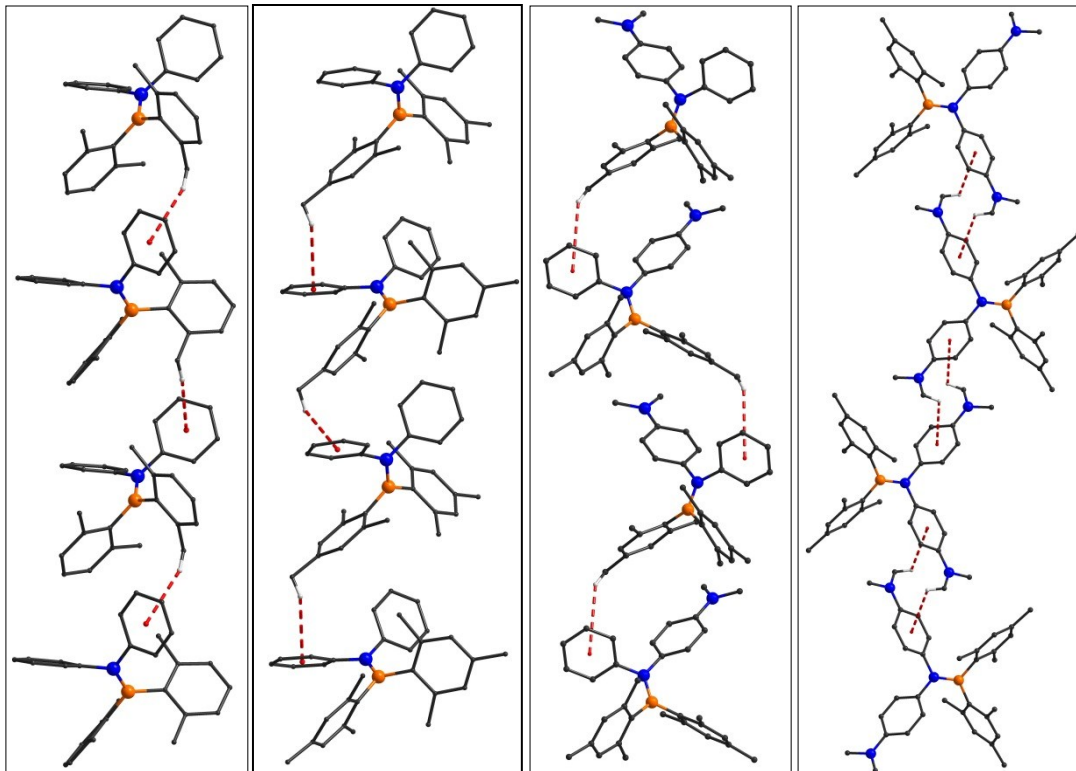

**Figure S23.** Intermolecular interaction diagrams of compound **1** (left), **2** (middle left), **3** (middle right) and **4** (right). (Hydrogen atoms are omitted for clarity).

## Aggregation Induced Emission Studies

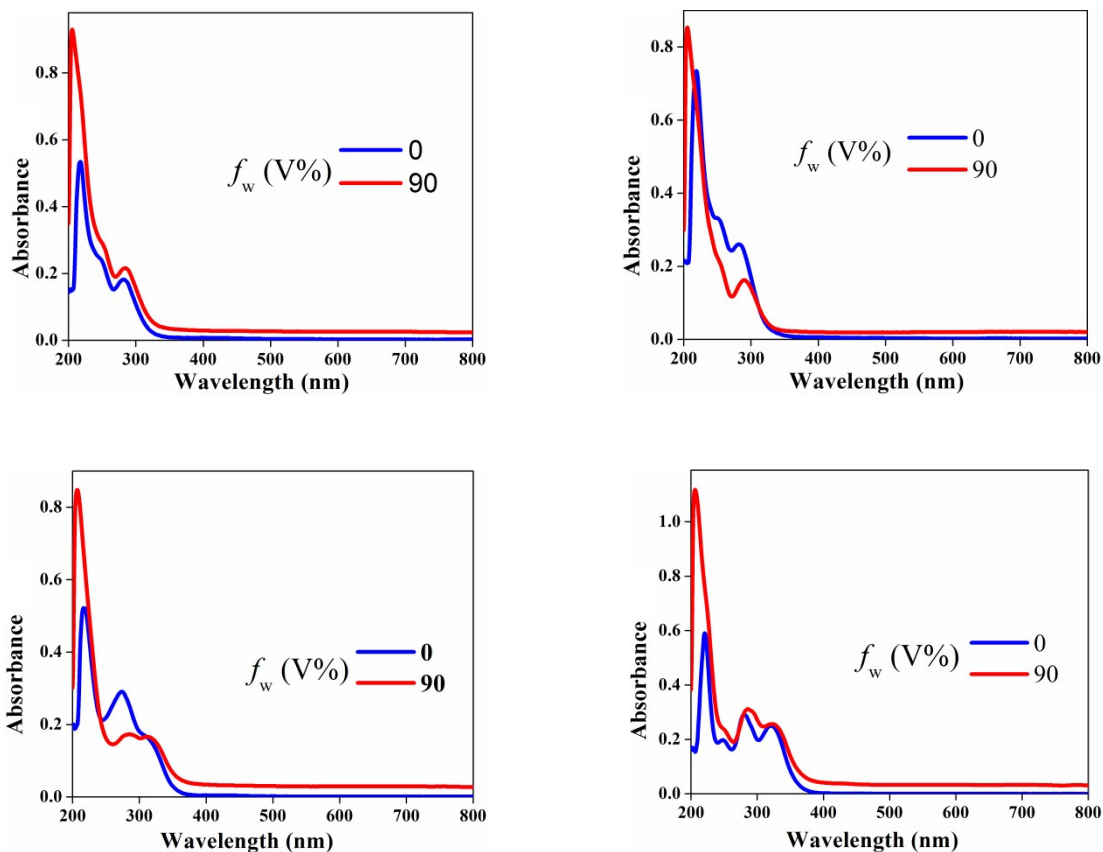

**Figure S24.** Absorption spectra of **1** (top left), **2** (top right), **3** (bottom left) and **4** (bottom right) in THF and 1:9 THF-H<sub>2</sub>O mixture (Conc. 10<sup>-5</sup> M, the level-off tails in the absorption spectra of 1:9 THF-water mixture is due to scattering of light by particles in solution, which confirms the formation of nano-aggregates.)

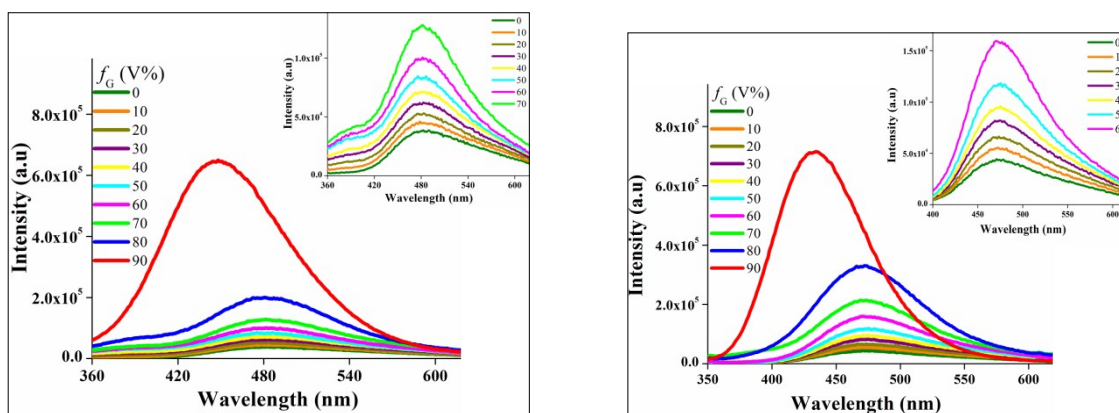

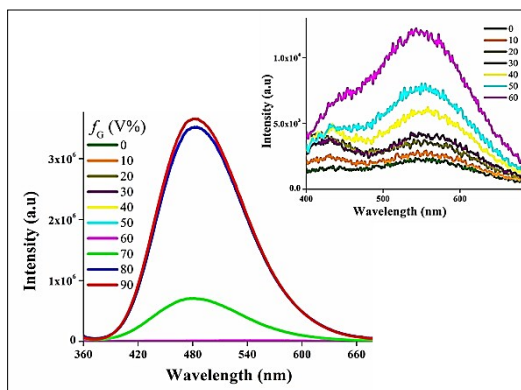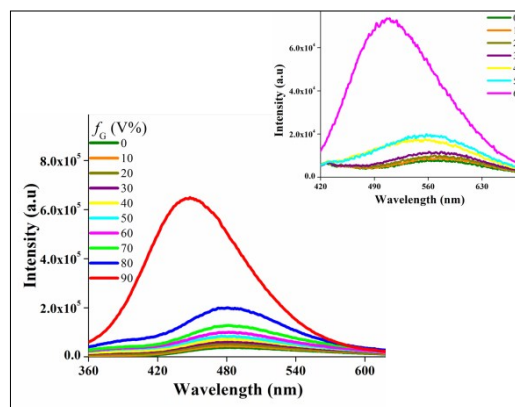

**Figure S25.** PL spectra of **1** (top left) **2** (top right), **3** (bottom left) and **4** (bottom right) respectively in MeOH/Glycerol mixtures with different glycerol fraction,  $f_G$  (V%) (Conc.  $10^{-4}$  M,  $\lambda_{ex}$  = 320 nm for **1** and **2** and 350 nm for **3** and **4**, and inset shows the PL spectra at lower glycerol fractions 0 to 60).

**Table S6.** Comparison of PL data of **1**, **2**, **3** and **4** in solution and aggregated state (Conc.  $10^{-4}$  M) with the tetraarylethene derivatives such as TPE, TMTPE and TPE-NMe<sub>2</sub> (Conc.  $10^{-5}$  M).

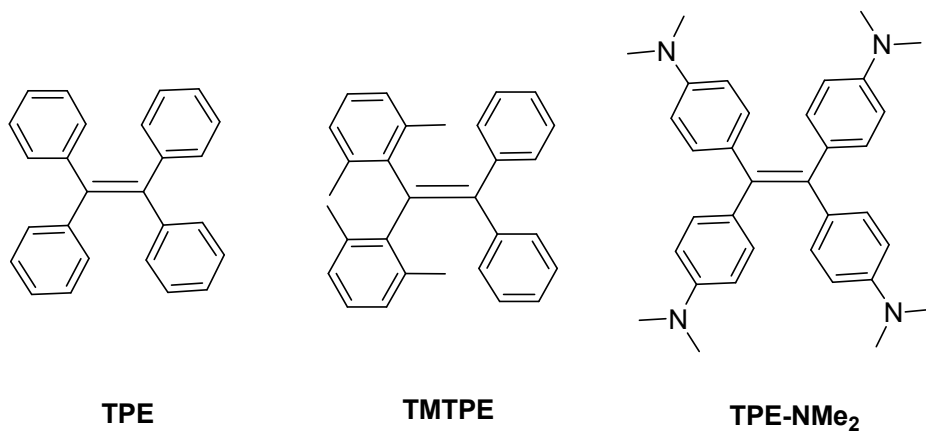

|                                          | AIE studies |                |                  | Viscochromism |                |                  |
|------------------------------------------|-------------|----------------|------------------|---------------|----------------|------------------|
|                                          | $F_w$ (V%)  | $\lambda_{em}$ | I/I <sub>0</sub> | $f_G$ (V%)    | $\lambda_{em}$ | I/I <sub>0</sub> |
| <b>TPE</b> <sup>1a</sup>                 | 90          | -              | 69               | -             | -              | -                |
| <b>TMTPE</b> <sup>1b</sup>               | 90          | -              | Non-AIE active   | -             | -              | -                |
| <b>TPE-NMe<sub>2</sub></b> <sup>1c</sup> | 90          |                | 64               | -             | -              | -                |
| <b>1</b>                                 | 0           | 487            |                  | 0             | 483            |                  |
|                                          | 90          | 464            | 18               | 90            | 448            | 17               |
| <b>2</b>                                 | 0           | 470            |                  | 0             | 471            |                  |
|                                          | 90          | 449            | 14               | 90            | 434            | 16               |
| <b>3</b>                                 | 0           | 559            |                  | 0             | 554            |                  |
|                                          | 90          | 489            | 391              | 90            | 489            | 1510             |
| <b>4</b>                                 | 0           | 581            |                  | 0             | 580            |                  |
|                                          | 90          | 504            | 134              | 90            | 497            | 455              |

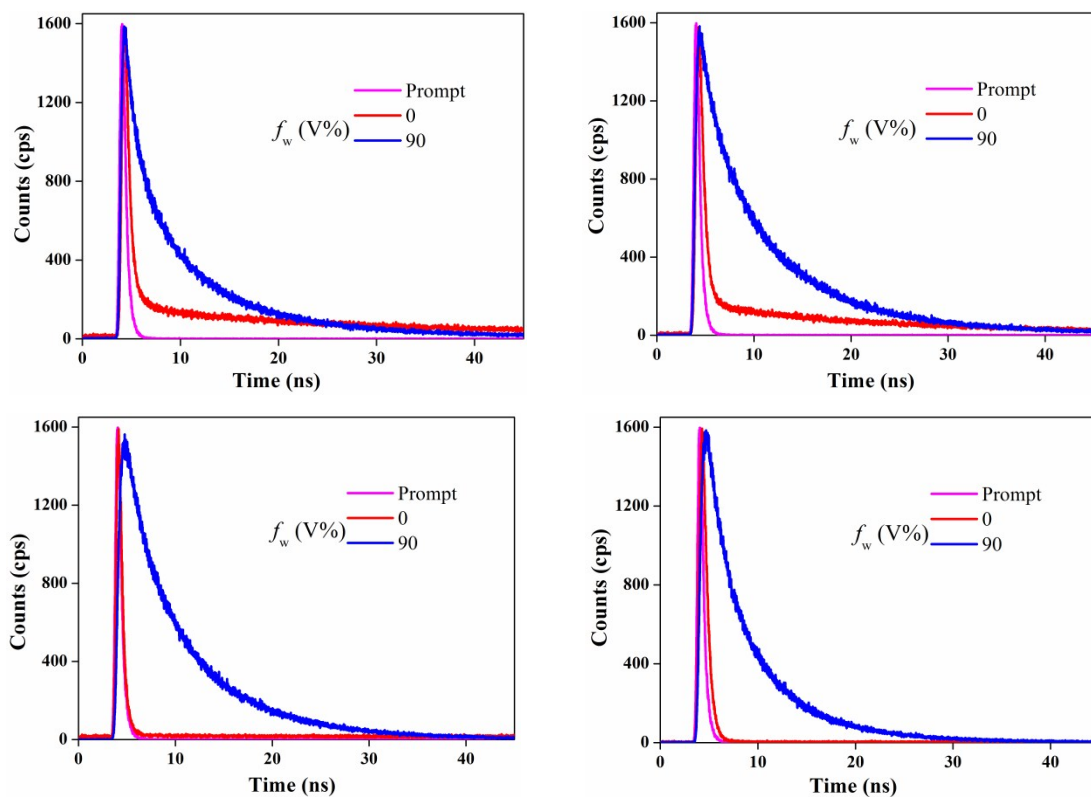

**Figure S26.** Time resolved fluorescence decay profile of **1** (top left), **2** (top right), **3** (bottom left), and **4** (bottom right) in THF and 1:9 THF-water mixture (Conc.  $10^{-4}$  M,  $\lambda_{\text{exc}} = 340$  nano-LED).

**Table S7.** Time resolved fluorescence decay data of **1**, **2**, **3** and **4** in THF and 1:9 THF-water mixture (Conc.  $10^{-4}$  M,  $\lambda_{\text{exc}} = 340$  nano-LED).

| Compound | H <sub>2</sub> O (%) | $\tau_1$ (ns) | A <sub>1</sub> | $\tau_2$ (ns) | A <sub>2</sub> | Mean life time<br>( $\langle \tau \rangle = A_1\tau_1 + A_2\tau_2$ ) | $\chi^2$ |
|----------|----------------------|---------------|----------------|---------------|----------------|----------------------------------------------------------------------|----------|
| <b>1</b> | 0                    | 0.22          | 0.30           | 20.99         | 0.70           | 14.76                                                                | 1.2      |
|          | 90                   | 1.48          | 0.13           | 7.42          | 0.85           | 6.50                                                                 | 1.0      |
| <b>2</b> | 0                    | 0.29          | 0.37           | 16.39         | 0.63           | 10.43                                                                | 1.1      |
|          | 90                   | 1.94          | 0.14           | 8.62          | 0.86           | 7.68                                                                 | 1.2      |
| <b>3</b> | 0                    | 0.09          | 0.79           | 0.6           | 0.21           | 0.20                                                                 | 1.2      |
|          | 90                   | 3.20          | 0.24           | 8.29          | 0.76           | 7.07                                                                 | 1.0      |
| <b>4</b> | 0                    | 0.30          | 0.68           | 0.61          | 0.32           | 0.40                                                                 | 1.1      |
|          | 90                   | 2.16          | 0.28           | 6.49          | 0.72           | 5.28                                                                 | 1.1      |

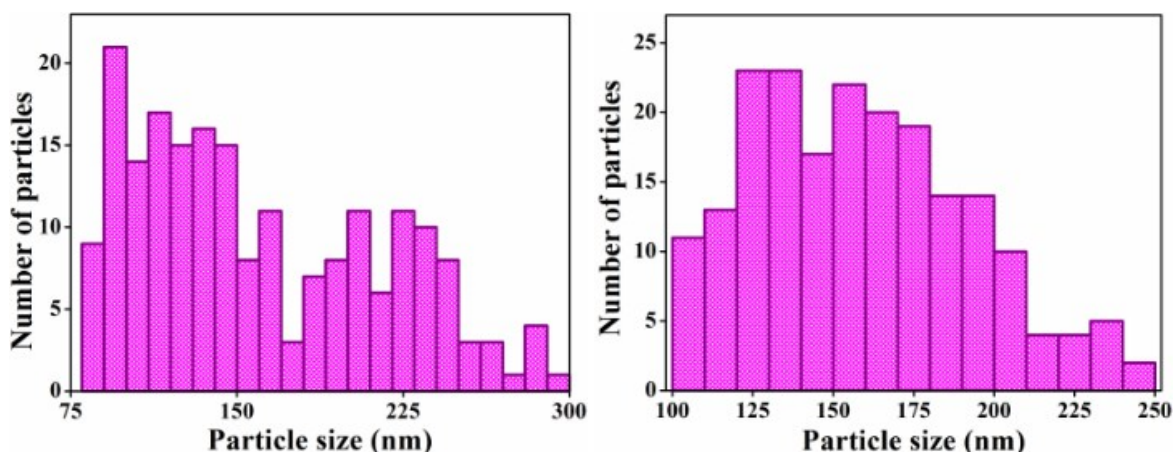

**Figure S27.** Particle size distribution pattern of compounds **3** (left) and **4** (right) obtained from TEM image by counting 200 particles using digital micrograph demo software and then plotting in origin, the average particle size was found to be  $160.284 \pm 55.39$  nm,  $158.578 \pm 33.8$  nm for **3** and **4** respectively.

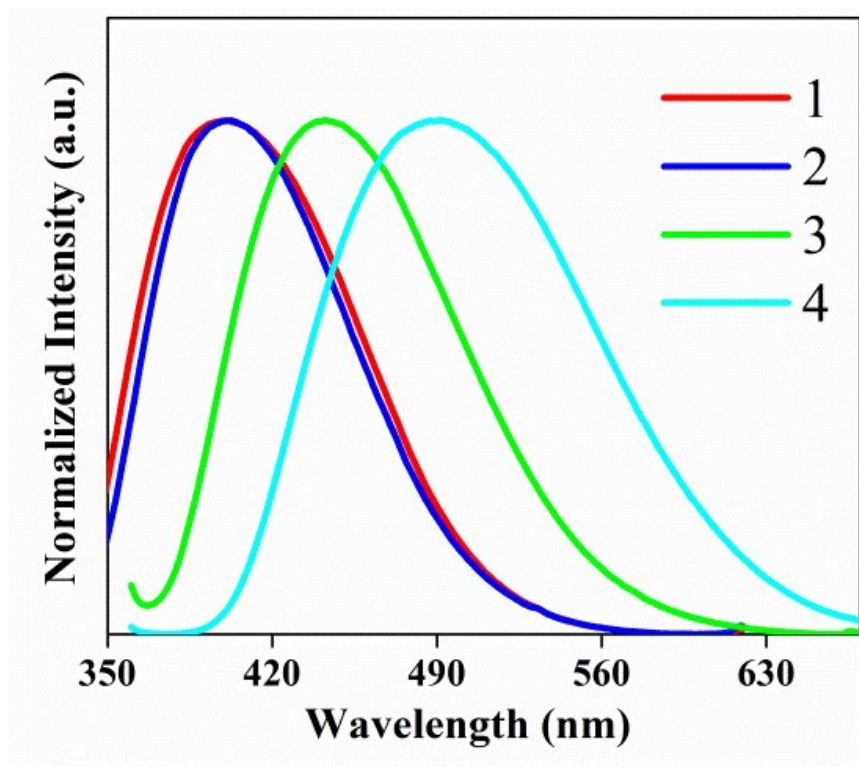

**Figure S28.** Solid state emission spectra (normalized) of **1**, **2**, **3** and **4** ( $\lambda_{\text{ex}} = 320$  nm for **1** and **2** and  $\lambda_{\text{ex}} = 350$  nm for **3** and **4**).

**Table S8.** Solid state fluorescence data of **1**, **2**, **3** and **4** ( $\lambda_{\text{ex}} = 320$  nm for **1** and **2** and 350 nm for **3** and **4** for PL measurements **and**  $\lambda_{\text{ex}} = 340$  nano-LED for TRF measurements).

|          | $\lambda$ | $\phi_F$ (%) | $\tau$ (ns) | $\chi^2$ | $K_r \times 10^9$ (S <sup>-1</sup> ) <sup>a</sup> | $K_{nr} \times 10^9$ (S <sup>-1</sup> ) <sup>a</sup> |
|----------|-----------|--------------|-------------|----------|---------------------------------------------------|------------------------------------------------------|
| <b>1</b> | 400       | 11.4         | 1.27        | 1.16     | 0.089                                             | 0.698                                                |
| <b>2</b> | 400       | 13.4         | 1.05        | 1.01     | 0.128                                             | 0.825                                                |
| <b>3</b> | 443       | 48.4         | 5.41        | 0.99     | 0.089                                             | 0.095                                                |
| <b>4</b> | 490       | 25.1         | 5.43        | 1.11     | 0.046                                             | 0.138                                                |

<sup>a</sup>Following equations have been used for the calculation of  $K_r$  and  $K_{nr}$ ;  $\{\phi_F = k_r/(k_r+k_{nr})\}$  and  $\{\tau = 1/(k_r+k_{nr})\}$ , where  $\phi_F$  is the fluorescence quantum yield,  $\tau$  is the average life time and  $k_r$  and  $k_{nr}$  are the radiative non-radiative ( $k_{nr}$ ) decay rate constants, respectively.<sup>2</sup>

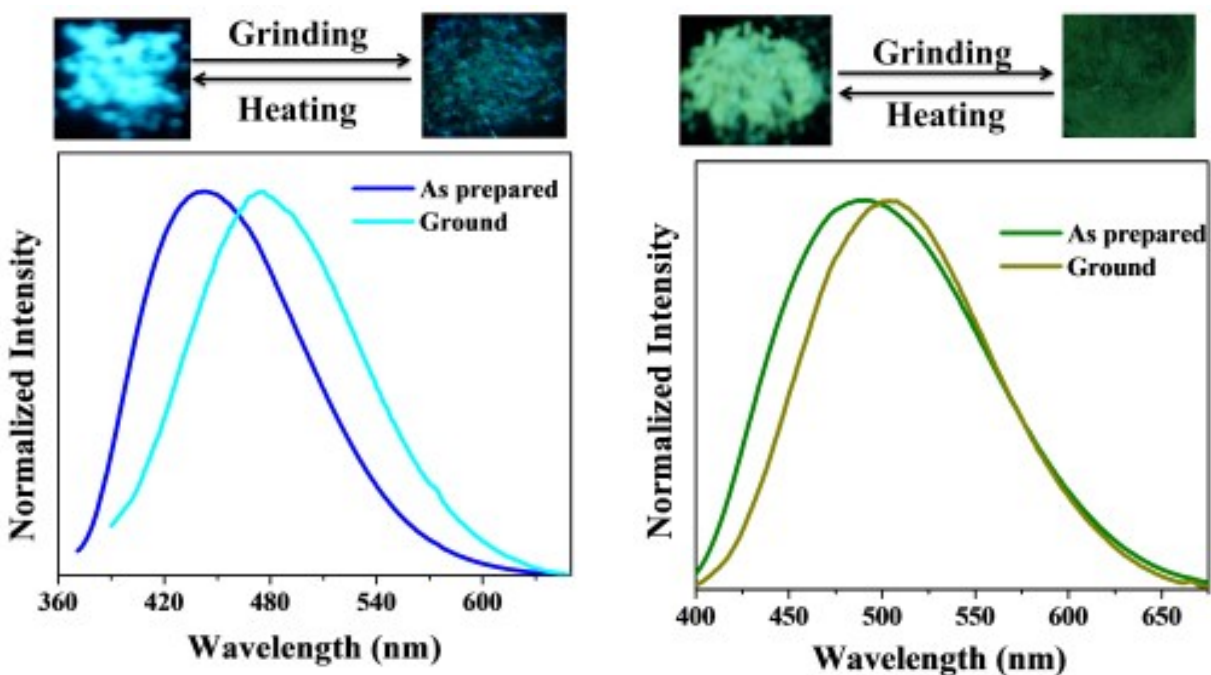

**Figure S29.** Solid state emission spectra (normalized) of as-prepared and ground samples of **3** (left) and **4** (right) ( $\lambda_{\text{ex}} = 350$ nm) and the corresponding images of compounds taken under UV light illumination ( $\lambda = 280$ -365 nm).

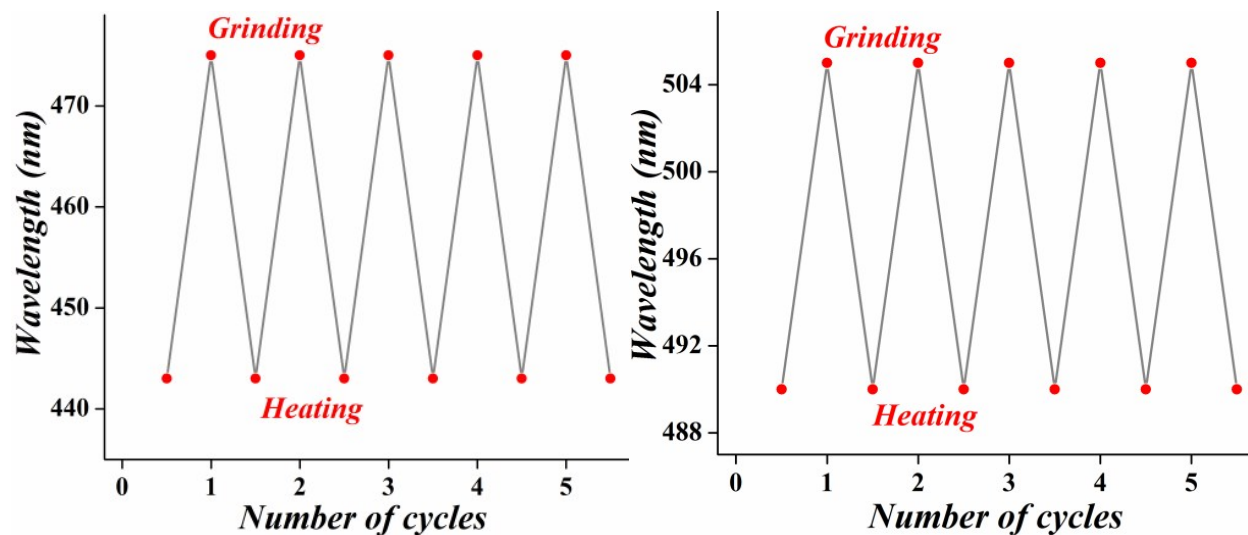

**Figure S30.** Reversible fluorescence responses of **3** (left) and **4** (right) over five successive cycles of grinding and annealing processes. ( $\lambda_{\text{ex}} = 350\text{nm}$ ).

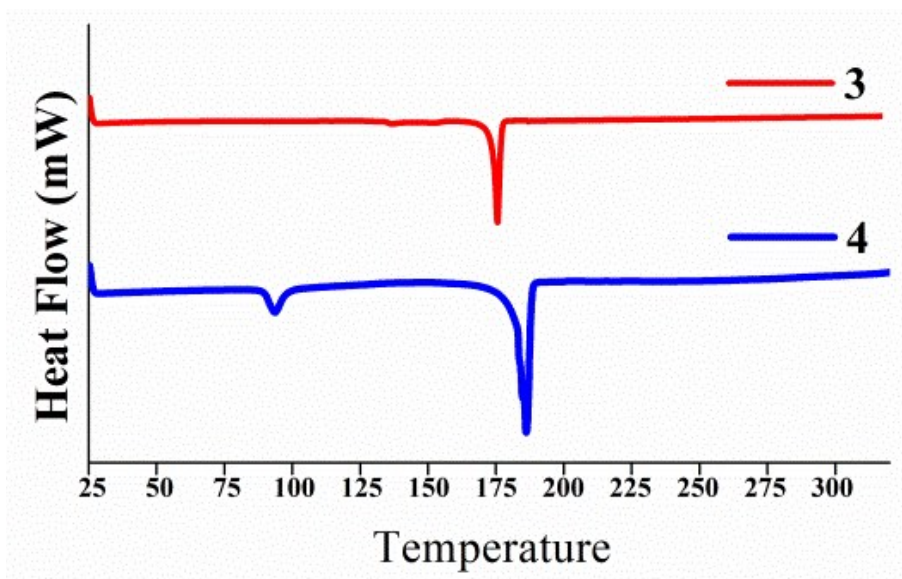

**Figure S31.** DSC traces of compounds **3** and **4**.

### Detection of nitroaromatics

Reactivity of compounds **1-4** towards different nitroaromatic compounds/ nitroalkanes were carried out by titrating  $100\ \mu\text{M}$  solution of compounds in 1:9 THF-water mixture with THF solution of nitroaromatic compounds/ nitroalkanes ( $50\ \text{mM}$ ) in excess quantity. Picric



acid sensor studies were carried out by titrating 100  $\mu\text{M}$  solution of compounds in 1:9 THF-water mixtures with aqueous solution of picric acid (50 mM). Emission spectral measurements were carried out gradually increasing the concentration of picric acid and spectra were collected 3 minutes after the addition of picric acid.

Fluorescence quenching efficiency for analytes were calculated by the following equation,  $\eta = (I_0 - I) / I_0 \times 100$ . Where,  $I_0$  is the initial intensity of the sensors and  $I$  is the intensity after addition of analytes

Stern-Volmer plot was obtained by plotting relative fluorescence intensity ( $I/I_0$ ) against picric acid concentration. Stern-Volmer constants (KSV) was obtained from the slope of the curve by fitting to the Stern-Volmer equation  $I/I_0 = 1 + K_{sv}[X]$ , where  $[X]$  is the concentration of picric acid (1.5 equivalents).

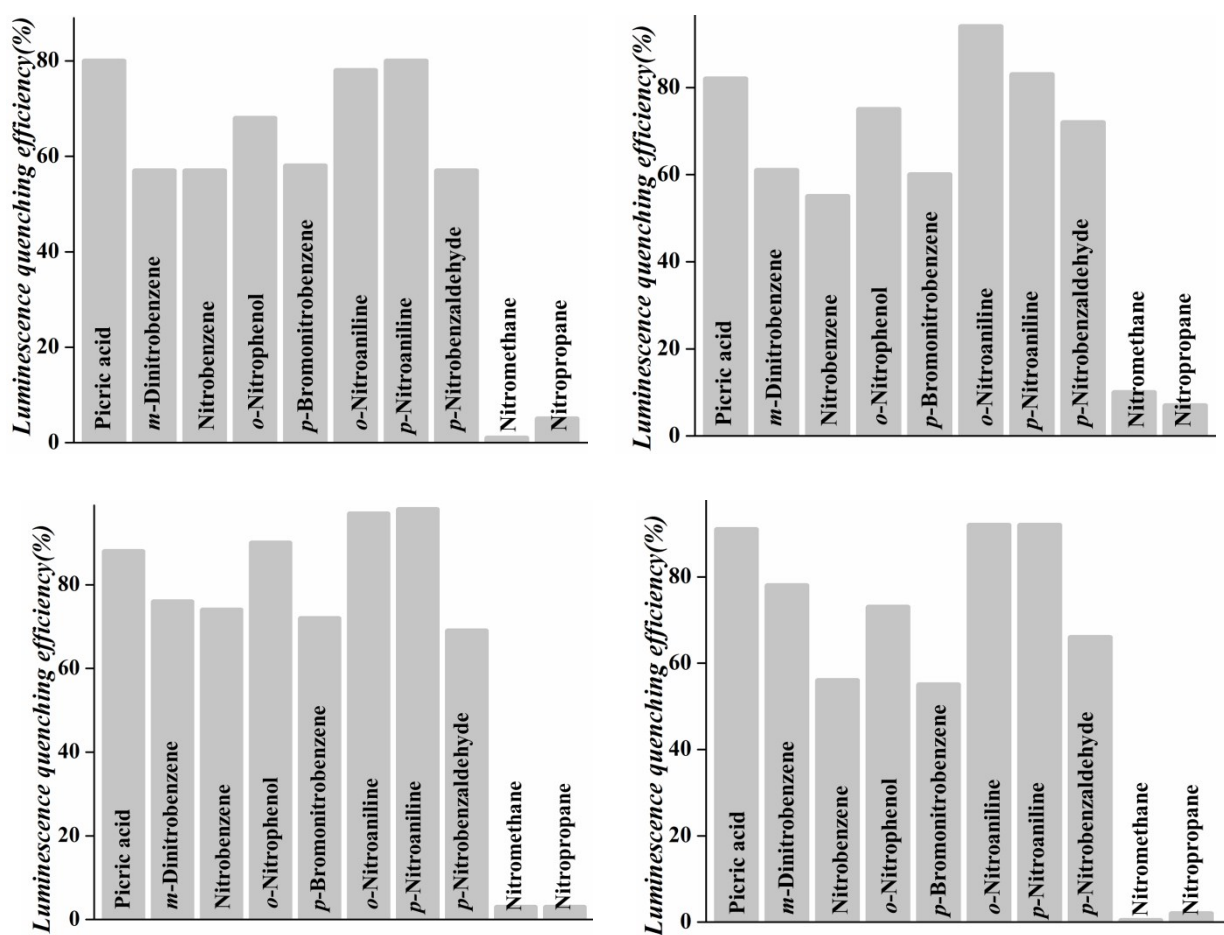

**Figure S32.** Plot showing reactivity of compounds **1** (top left), **2** (top right), **3** (bottom left), and **4** (bottom right), (100  $\mu\text{M}$  in 1:9 THF-water mixture) with different nitroaromatics (2 equivalents) and nitroalkanes (4 equivalents).

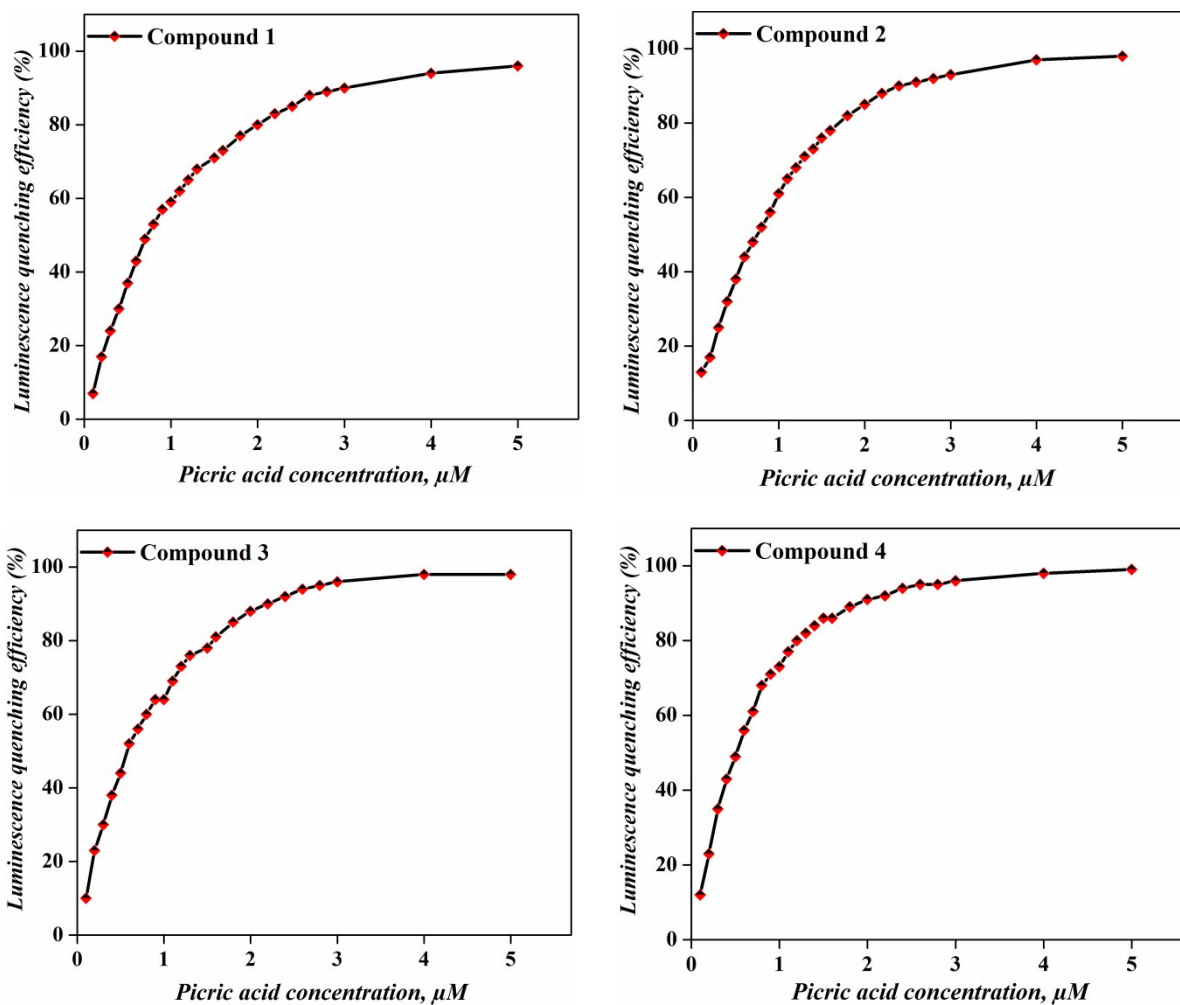

**Figure S33.** Luminescence quenching efficiency of compounds **1** (top left), **2** (top right), **3** (bottom left), and **4** (bottom right), (100  $\mu\text{M}$  in 1:9 THF-water mixture) with increasing concentration of picric acid.

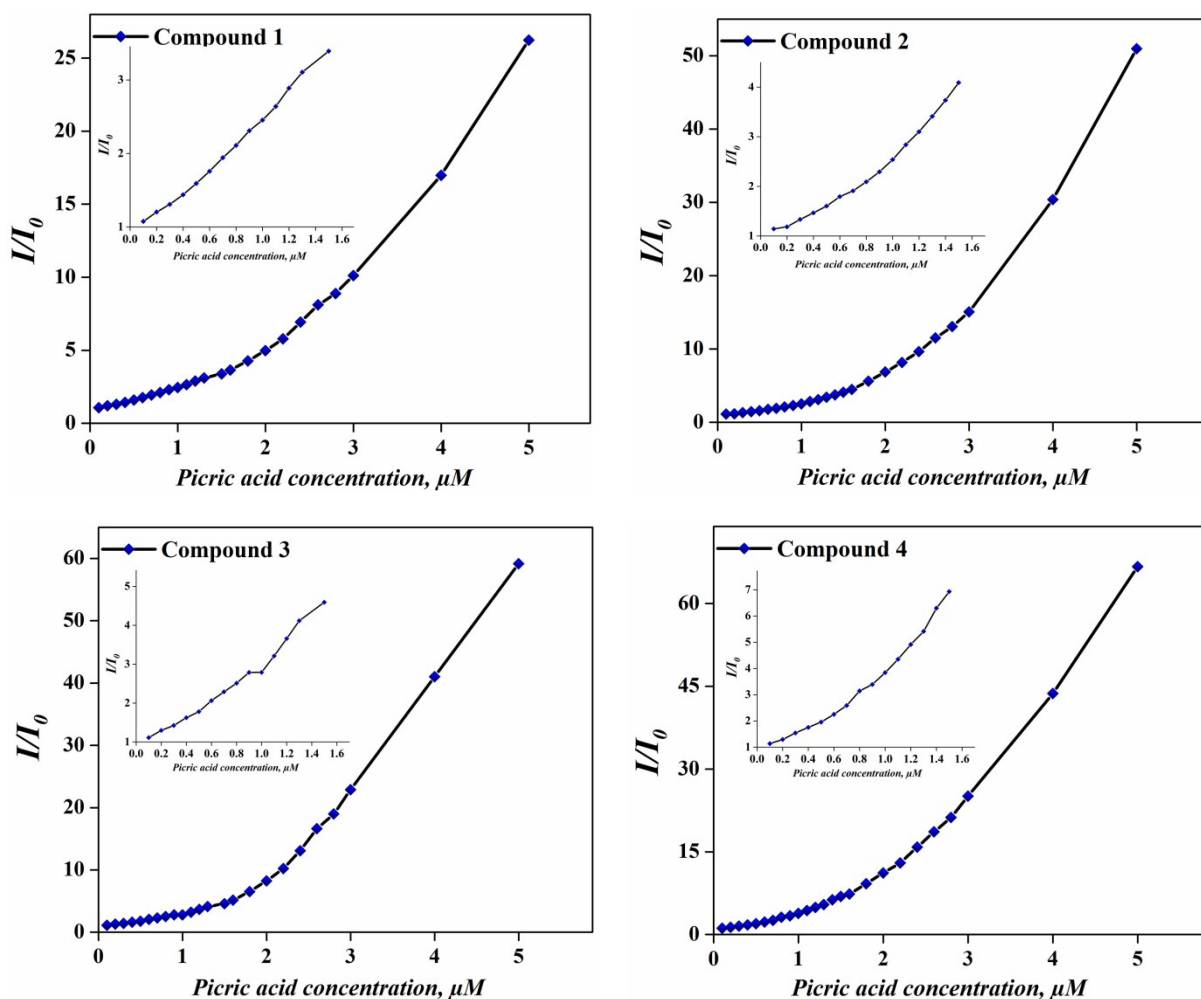

**Figure S34.** Stern-Volmer plots for the luminescence quenching of compounds **1** (top left), **2** (top right), **3** (bottom left), and **4** (bottom right), (100  $\mu\text{M}$  in 1:9 THF-water mixture) with increasing concentration of picric acid and inset shows the corresponding Stern-Volmer plots at lower concentrations of picric acid.

## References

- (a) G.-F. Zhang, Z.-Q. Chen, M. P. Aldred, Z. Hu, T. Chen, Z. Huang, X. Meng and M.-Q. Zhu, *Chem. Commun.* 2014, **50**, 12058; (b) G.-F. Zhang, Z.-Q. Chen, M. P. Aldred, Z. Hu, T. Chen, Z. Huang, X. Meng and M.-Q. Zhu, *Chem. Commun.*, 2014, **50**, 12058-12060; (c) Q. Qi, J. Zhang, B. Xu, B. Li, S. X.-A. Zhang and W. Tian, *J. Phys. Chem. C*, 2013, **117**, 24997-25003.
- B. Kupcewicz and M. Małacka, *Cryst. Growth Des.*, 2015, **15**, 3893-3904.
